# Supplementary material for: Synthesis, In Silico Prediction and In Vitro Evaluation of Antimicrobial Activity, DFT Calculation and Theoretical Investigation of Novel Xanthines and Uracil Containing Imidazolone Derivatives
Source: MDPI journal article supplement (doi:10.3390/ijms222010979), 2021-10-12
Supplement: s1 [file s1]

**Table S1:** Equilibrium geometric parameters bond lengths (Å), bond angles (°),dihedral angles (°), total energy (k cal/mol) , heat of formation (k cal/mol), Mulliken charges over atoms and dipole moment of the 6-amino-5-(4-benzylidene-2-methyl-5-oxo-4,5-dihydro-1H-imidazol-1-yl)-1-ethylpyrimidine-2,4(1H,3H)-dione, compound **12** by using DFT calculations.

| Bond length (Å)             |         |              |             |              |         |
|-----------------------------|---------|--------------|-------------|--------------|---------|
| C1-C2                       | 1.351   | C1-N13       | 1.343       | C17-C19      | 1.501   |
| C2-N6                       | 1.355   | N6-C9        | 1.458       | C15-C20      | 1.343   |
| C2-N12                      | 1.342   | C9-C11       | 1.534       | C20-C21      | 1.351   |
| C5-N6                       | 1.388   | N13-C14      | 1.349       | C21-C22      | 1.352   |
| C5-N4                       | 1.381   | C14-O18      | 1.209       | C22-C23      | 1.342   |
| C5-O8                       | 1.208   | C14-C15      | 1.341       | C23-C24      | 1.339   |
| C3-N4                       | 1.376   | C15-N16      | 1.361       | C24-C25      | 1.338   |
| C3-O7                       | 1.211   | N16-C17      | 1.352       | C25-C26      | 1.344   |
| C1-C3                       | 1.362   | N13-C17      | 1.368       | C21-C26      | 1.347   |
| Bond angle (°)              |         |              |             |              |         |
| C1C2N12                     | 117.49  | C29C1N13     | 121.55      | C1N13C17     | 129.89  |
| C1N13C14                    | 130.72  | N12C2N6      | 119.23      | N12C2C1      | 117.49  |
| N6C9C11                     | 111.67  | C21C20C15    | 136.14      | C20C21C26    | 126.41  |
| C20C21C22                   | 117.68  |              |             |              |         |
| Dihedral angles (°)         |         |              |             |              |         |
| C5N6C9C11                   | 90.54   | C11C9N6C2    | -95.21      | N12C2N6C9    | 21.27   |
| C5N6C2N12                   | -164.45 | N12C2C1C3    | 175.76      | N12C2C1N13   | -4.43   |
| C17N13C1C2                  | -70.47  | C17N13C1C3   | 109.33      | N16C17N13C1  | -166.79 |
| C1N13C14C15                 | 162.89  | C1N13C14O18  | -26.87      | C26C21C20C15 | 7.63    |
| C15C20C21C22                | -176.18 | N16C15C20C21 | -171.89     | C21C20C15C14 | 4.55    |
| Mulliken charges            |         |              |             |              |         |
| C1                          | -0.136  | N6           | -0.208      | N13          | -0.135  |
| C2                          | 0.305   | O7           | -0.442      | C14          | 0.392   |
| C3                          | 0.428   | O8           | -0.432      | O18          | -0.425  |
| N4                          | -0.328  | C9           | 0.072       | N16          | -0.385  |
| C5                          | 0.509   | N12          | -0.359      | C15          | 0.068   |
| C17                         | 0.265   |              |             |              |         |
| Total energy/ k cal/mol     |         |              | -141856.224 |              |         |
| Heat of formation k cal/mol |         |              | -8661.756   |              |         |
| Total dipole moment/D       |         |              | 8.326       |              |         |

**Table S2:** Equilibrium geometric parameters bond lengths (Å), bond angles (°),dihedral angles (°), total energy (k cal/mol), heat of formation (k. cal/mol), Mulliken charges over atoms and dipole moment of the 6-amino-5-(4-benzylidene-2-methyl-5-oxo-4,5-dihydro-1H-imidazol-1-yl)-1-methyl-2-thioxo-2,3-dihydropyrimidin-4(1H)-one, compound **13** by using DFT calculations.

| Bond length (Å)             |         |              |             |              |        |
|-----------------------------|---------|--------------|-------------|--------------|--------|
| C1-C2                       | 1.347   | C9-N6        | 1.451       | C14-C19      | 1.342  |
| C2-N6                       | 1.348   | C5-S8        | 1.692       | C19-C20      | 1.351  |
| C5-N6                       | 1.347   | C1-N12       | 1.342       | C20-C21      | 1.352  |
| C5-N4                       | 1.383   | N12-C13      | 1.348       | C21-C22      | 1.343  |
| C3-N4                       | 1.369   | C13-C14      | 1.340       | C22-C23      | 1.339  |
| C1-C3                       | 1.362   | C14-N15      | 1.359       | C23-C24      | 1.341  |
| C3-O7                       | 1.209   | C16-N15      | 1.339       | C24-C25      | 1.343  |
| C2-N11                      | 1.339   | C16-C18      | 1.501       | C20-C25      | 1.347  |
| Bond angle (°)              |         |              |             |              |        |
| C9N6C5                      | 122.87  | C9N6C2       | 121.44      | C1C2N11      | 120.22 |
| N11C2N6                     | 118.79  | N6C5S8       | 121.95      | N4C5S8       | 119.41 |
| O7C3N4                      | 119.25  | C7C3C1       | 120.69      | N11C2C1      | 120.22 |
| N12C1C2                     | 122.62  | N12C1C3      | 121.65      | C1N12C13     | 129.48 |
| C1N12C16                    | 130.53  | C18C16N15    | 122.15      | C20C19C14    | 134.51 |
| C18C16N12                   | 124.29  | C19C14C13    | 133.65      | C19C20C21    | 118.23 |
| Dihedral angles (°)         |         |              |             |              |        |
| C9N6C5N4                    | 119.63  | C9N6C2C1     | -125.36     | C5N6C2N11    | 49.59  |
| C9N6C5S8                    | -43.49  | C3N4C5S8     | -174.89     | C2N6C5S8     | 153.03 |
| N11C2N6C5                   | -146.64 | N11C2C1C3    | 175.95      | O7C3C1C2     | 169.59 |
| N12C1C3O7                   | -13.93  | C3C1N12C6    | 110.99      | C3C1N12C13   | -49.18 |
| C13C14C19C20                | 6.42    | C14C19C20C21 | -173.59     | C14C19C20C25 | 11.35  |
| Mulliken charges            |         |              |             |              |        |
| C1                          | -0.118  | N6           | -0.163      | N12          | -0.134 |
| C2                          | 0.296   | O7           | -0.413      | C13          | 0.393  |
| C3                          | 0.423   | S8           | -0.616      | C14          | 0.064  |
| N4                          | -0.261  | C9           | 0.019       | N15          | -0.349 |
| C5                          | 0.478   | N11          | -0.359      | C16          | 0.264  |
| C18                         | -0.201  |              |             |              |        |
| Total energy/ k cal/mol     |         |              | -132805.565 |              |        |
| Heat of formation k cal/mol |         |              | -8086.449   |              |        |
| Total dipole moment/D       |         |              | 8.586       |              |        |

**Table S3:** Equilibrium geometric parameters bond lengths (Å), bond angles (°),dihedral angles (°), total energy (k cal/mol) , heat of formation (k cal/mol), Mulliken charges over atoms and dipole moment of the 6-amino-5-((4-(dimethylamino)benzylidene)amino)-1-ethylpyrimidine-2,4(1H,3H)-dione, compound **16** by using DFT calculations

| Bond length (Å)             |         |              |             |              |         |
|-----------------------------|---------|--------------|-------------|--------------|---------|
| C1-C2                       | 1.347   | N9-C34       | 1.457       | C14-N15      | 1.376   |
| C2-C3                       | 1.343   | C1-C25       | 1.346       | C12-C14      | 1.361   |
| C3-C4                       | 1.342   | C25-N24      | 1.347       | C13-N23      | 1.343   |
| C4-C5                       | 1.342   | C12-N24      | 1.351       | N17-C20      | 1.459   |
| C5-C6                       | 1.343   | C12-C13      | 1.352       | C20-C22      | 1.534   |
| C1-C6                       | 1.347   | C13-N17      | 1.367       | C16-O19      | 1.208   |
| C4-N9                       | 1.351   | N17-C16      | 1.388       | C14-O18      | 1.211   |
| N9-C33                      | 1.457   | C16-N15      | 1.379       |              |         |
| Bond angle (°)              |         |              |             |              |         |
| C33N9C34                    | 119.99  | C34N9C4      | 120.05      | C33N9C4      | 119.99  |
| C3C4N9                      | 120.14  | N9C4C5       | 120.26      | C6C1C25      | 119.92  |
| C2C1C25                     | 121.87  | C1C25N24     | 121.79      | C25N24C12    | 120.42  |
| N24C21C13                   | 118.49  | N24C12C14    | 123.63      | N23C13N17    | 119.95  |
| N23C13C12                   | 116.15  | C20N17C13    | 121.78      | C20N17C16    | 119.12  |
| N17C20C22                   | 110.71  | C12C14O18    | 122.35      | O18C14N15    | 117.69  |
| Dihedral angles (°)         |         |              |             |              |         |
| C13N17C20C22                | -83.59  | C33N9C4C3    | -73.95      | C25N24C12C14 | 50.26   |
| C20N17C16O19                | 1.65    | C34N9C4C5    | -76.79      | C25N24C12C13 | -131.88 |
| C20N17C13C12                | 178.47  | C22C20N17C16 | 93.05       | N24C25C1C6   | 179.69  |
| N24C12C14O18                | 0.10    | C20N17C13N23 | -2.51       | C33N9C4C5    | 106.00  |
| C1C25N24C12                 | -179.58 | N23C13C12N24 | 0.60        | C34N9C4C3    | 103.49  |
| N24C25C1C2                  | -0.510  |              |             |              |         |
| Mulliken charges            |         |              |             |              |         |
| C12                         | 0.129   | N17          | -0.203      | N9           | -0.437  |
| C13                         | 0.298   | O18          | -0.448      | C33          | 0.032   |
| C14                         | 0.424   | O19          | -0.459      | C34          | 0.033   |
| N15                         | -0.429  | C20          | 0.069       | C25          | 0.071   |
| C16                         | 0.506   | C4           | 0.186       |              |         |
| Total energy/ k cal/mol     |         |              | -123990.259 |              |         |
| Heat of formation k cal/mol |         |              | -8026.826   |              |         |
| Total dipole moment/D       |         |              | 6.051       |              |         |

**Table S4:** Computed excitation energies (eV), electronic transition configurations and wave lengths (nm) of the obtained stable compounds; **13** and **16** by using B3LYP/Cep-31G for the, ( $f \geq 0.001$ )  $f$ = oscillator strengths compared with experimental data of UV-Visible spectra,  $\lambda_{\max}$ , nm.

| Compound  | eV     | nm     | Major Contributions                                                                                                                                                                                                                                                                                                             | Assignment      | $\lambda_{\max}$ , nm |
|-----------|--------|--------|---------------------------------------------------------------------------------------------------------------------------------------------------------------------------------------------------------------------------------------------------------------------------------------------------------------------------------|-----------------|-----------------------|
| <b>13</b> | 4.7546 | 260.77 | H-11 $\rightarrow$ L+1(19.8%), H-11 $\rightarrow$ L+2(3.7%), H-8 $\rightarrow$ L+1 (9.7%), H-7 $\rightarrow$ L+1(3.7%), H-7 $\rightarrow$ L+2(4.9%), H-3 $\rightarrow$ L+1(31.1%), H-3 $\rightarrow$ L+2(3.8%), H $\rightarrow$ L+1 (16.1%)                                                                                     | $\pi$ - $\pi^*$ | 267                   |
|           | 4.7117 | 263.14 | H-7 $\rightarrow$ L (2.6%), H-6 $\rightarrow$ L (5.2%), H-5 $\rightarrow$ L (15.7%), H-4 $\rightarrow$ L (3.5%), H-3 $\rightarrow$ L (49%), H-3 $\rightarrow$ L(2.5%), H-1 $\rightarrow$ L (2.5%), H-1 $\rightarrow$ L+4(2.2%)                                                                                                  | $\pi$ - $\pi^*$ |                       |
|           | 4.3637 | 284.13 | H-8 $\rightarrow$ L+1 (4.1%), H-3 $\rightarrow$ L (2.7%), H-3 $\rightarrow$ L+1 (3.2%), H-3 $\rightarrow$ L+2 (32.4%), H-1 $\rightarrow$ L+2 (16.2%), H $\rightarrow$ L+1 (8%), H $\rightarrow$ L+2(32.9%)                                                                                                                      | $\pi$ - $\pi^*$ | 290                   |
|           | 4.2944 | 288.71 | H-10 $\rightarrow$ L (8.2%), H-10 $\rightarrow$ L+4 (2.5%), H-9 $\rightarrow$ L (25%), H-3 $\rightarrow$ L+1 (4.8%), H-9 $\rightarrow$ L+4(7.8%), H-6 $\rightarrow$ L(3.1%), H-6 $\rightarrow$ L+4 (4.5%), H-3 $\rightarrow$ L+4 (2.9%), H-5 $\rightarrow$ L (17.2%), H-5 $\rightarrow$ L+4(18.8%), H-5 $\rightarrow$ L+5(4.5%) | $\pi$ - $\pi^*$ |                       |
|           | 3.886  | 319.05 | H-11 $\rightarrow$ L+9 (2.4%), H-1 $\rightarrow$ L+1 (86.7%), H-1 $\rightarrow$ L+2 (7.6%), H $\rightarrow$ L+1 (3.1%)                                                                                                                                                                                                          | $\pi$ - $\pi^*$ | 322                   |
|           | 3.7876 | 326.03 | H-7 $\rightarrow$ L+1 (40.5%), H-7 $\rightarrow$ L+2(22.4%), H-7 $\rightarrow$ L+5 (3%), H-7 $\rightarrow$ L+6 (21.6%), H-6 $\rightarrow$ L+1 (5.4%), H-6 $\rightarrow$ L+2(3.4%)                                                                                                                                               | $\pi$ - $\pi^*$ |                       |
|           | 3.7785 | 328.13 | H $\rightarrow$ L (100%)                                                                                                                                                                                                                                                                                                        | $\pi$ - $\pi^*$ |                       |
|           | 3.6527 | 339.43 | H-10 $\rightarrow$ L (2.8%), H-9 $\rightarrow$ L(12.7%), H-9 $\rightarrow$ L+4 (8.1%), H-6 $\rightarrow$ L (9.7%), H-6 $\rightarrow$ L+5(8.5%), H-5 $\rightarrow$ L (4.1%), H-5 $\rightarrow$ L+5 (10.7%), H-4 $\rightarrow$ L (82.6%), H-2 $\rightarrow$ L+2 (17.3%)                                                           | $\pi$ - $\pi^*$ | 339                   |
|           | 3.4525 | 359.12 | H-2 $\rightarrow$ L+1 (3.2%), H-3 $\rightarrow$ L (7.8%)                                                                                                                                                                                                                                                                        | $\pi$ - $\pi^*$ | 357                   |
| <b>16</b> | 4.9616 | 249.89 | H-1 $\rightarrow$ L (8.6%), H $\rightarrow$ L+1 (6.1%), H-1 $\rightarrow$ L+1 (3.2%), H $\rightarrow$ L+1 (47.7%), H-1 $\rightarrow$ L+4 (4.9%), H-1 $\rightarrow$ L (29.2%)                                                                                                                                                    | $\pi$ - $\pi^*$ | 260                   |
|           | 4.4466 | 278.83 | H-8 $\rightarrow$ L+3 (29.2%), H-7 $\rightarrow$ L+3 (26.6%), H-6 $\rightarrow$ L+3 (30.8%), H-5 $\rightarrow$ L+3 (9.8%), H-3 $\rightarrow$ L+3 (3.3%)                                                                                                                                                                         | $\pi$ - $\pi^*$ | 291                   |
|           | 3.9555 | 313.44 | H-8 $\rightarrow$ L (9.7%), H-6 $\rightarrow$ L (12.1%), H-3 $\rightarrow$ L (4.8%), H-2 $\rightarrow$ L (14.5%), H-1 $\rightarrow$ L (21.4%), H $\rightarrow$ L (37.1%)                                                                                                                                                        | $\pi$ - $\pi^*$ | 321                   |
|           | 3.6964 | 335.42 | H-8 $\rightarrow$ L+1 (6.1%), H-5 $\rightarrow$ L+1 (37.1%), H-5 $\rightarrow$ L+3 (10.2%), H-5 $\rightarrow$ L+5 (9%), H-3 $\rightarrow$ L+1 (20.4%), H-3 $\rightarrow$ L+3 (5%), H-3 $\rightarrow$ L+5 (4.2%), H-2 $\rightarrow$ L+1 (7.6%)                                                                                   | $\pi$ - $\pi^*$ | 345                   |
|           | 3.3903 | 365.71 | H-8 $\rightarrow$ L (7.2%), H-6 $\rightarrow$ L (11.7%), H-3 $\rightarrow$ L (3%), H-2 $\rightarrow$ L (3.3%), H-1 $\rightarrow$ L (4.2%), H $\rightarrow$ L (66.4%), H $\rightarrow$ L+4 (3.8%)                                                                                                                                | $\pi$ - $\pi^*$ | 376                   |
